# Supplementary material
Source: Springer Nature journal article supplement (https://www.springermedizin.de/resource/supplementary/12967_2011_987_MOESM2_ESM.pdf/9577256)

A

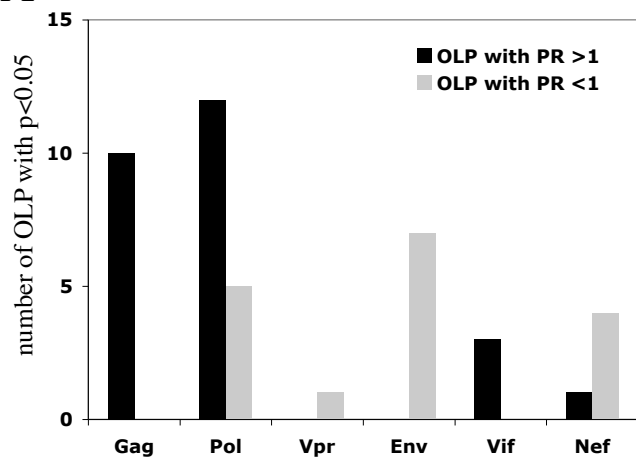

B

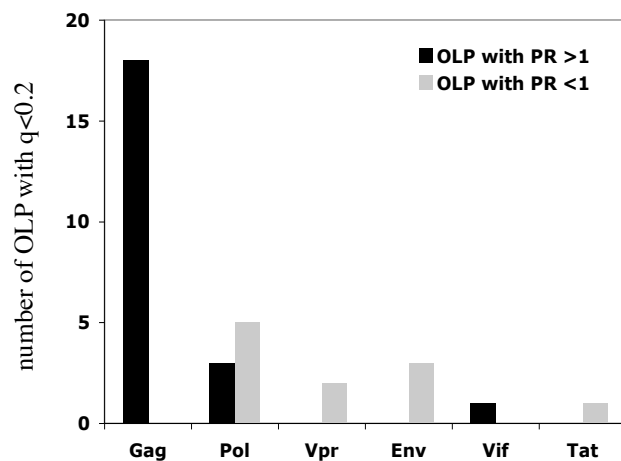

C

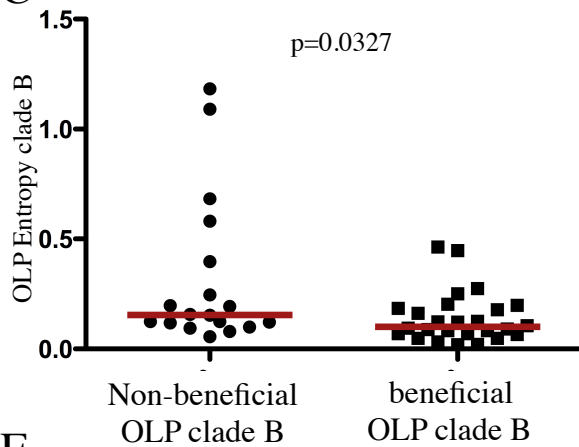

D

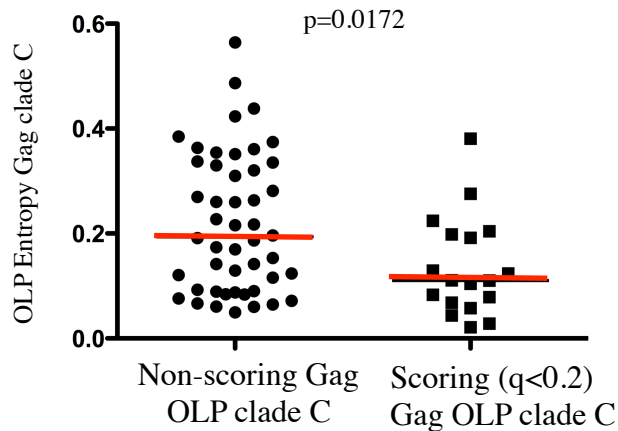

E

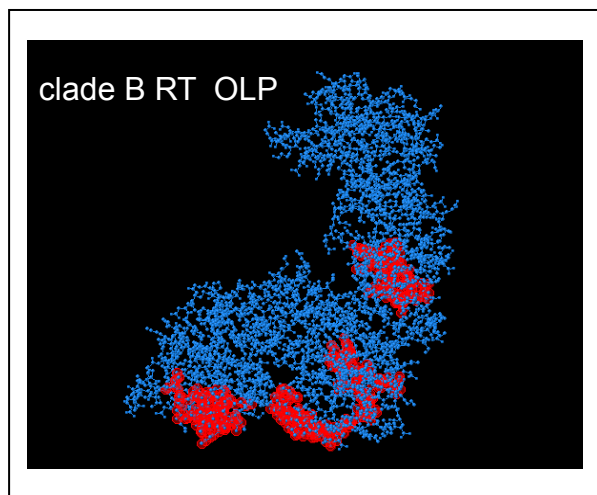

F

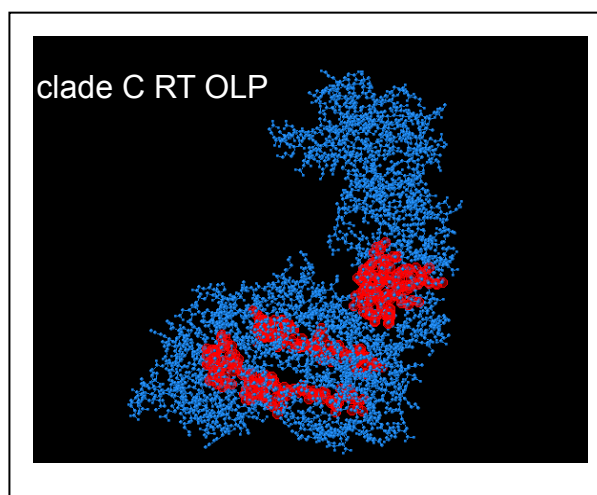

Supplement: MOESM2 [file 9577256]
